# Supplementary material for: Impact of iron salt addition on the viscoelastic properties of rice flours
Source: Research Square preprint supplement (doi:10.21203/rs.3.rs-8688528/v1), 2026-01-30
Supplement: Supplementary file 1 [file fbfb06a10e43f54415bdc657.docx]

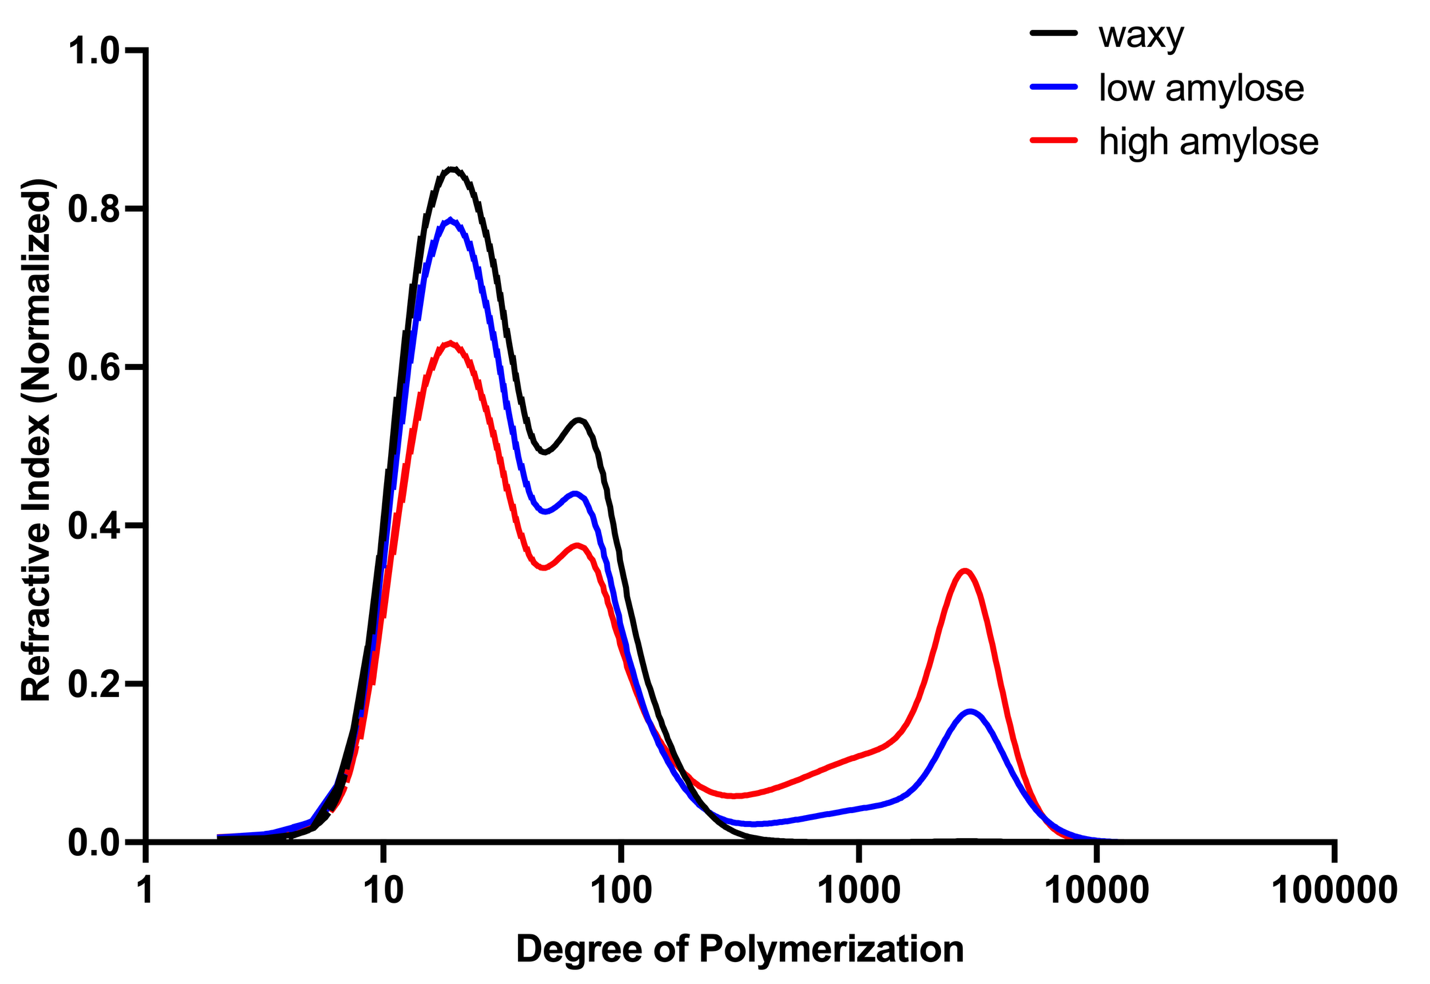


**Supplementary Figure 1**. SEC molecular weight distribution of debranched starch from rice with varying amylose contents
